# Supplementary material
Source: PubMed Central journal article supplement (PMC2585124)
Supplement: supp_179_12_1289__1.pdf [file supp_179_12_1289__1.pdf]

**Appendix 1:** Health conditions prioritized under Chile's universal health care plan

1. Delivery care with analgesia
2. All childhood cancers
3. Cervicouterine cancer
4. Breast cancer
5. Leukemia (adults)
6. Lymphoma (adults)
7. Testicular cancer
8. Prostate cancer
9. Stomach cancer
10. Cancer of the gallbladder and bile duct
11. Terminal cancers (palliative care)
12. Ischemic disease (myocardial infarction)
13. Behavioural disorders
14. Congenital heart disease (operable)
15. Neural tube defects
16. Cleft lip/palate
17. Chronic renal insufficiency
18. HIV/AIDS
19. Cataracts
20. Major burns
21. Polytrauma with or without medullary lesion
22. Hernia of the nucleus pulposus
23. Tumours and cysts of the substantia nigra pars compacta
24. Aneurysms
25. Diabetic retinopathy (children under 9 years)
26. Refractive errors
27. Tooth loss in older adults
28. Surgery requiring prosthesis
29. Hypoacusis
30. Benign hypertrophy of the prostate
31. Pneumonias in older adults
32. Orthotics for older adults (canes, wheelchairs, others)
33. Hemophilia
34. Cystic fibrosis
35. Scoliosis
36. Depression
37. Alcohol/drug dependence
38. Psychosis (severe psychiatric disorders)
39. Bronchial asthma
40. Chronic obstructive pulmonary disease
41. Arterial hypertension
42. Encephalitic vascular accident
43. Diabetes mellitus, types 1 and 2
44. Prematurity
45. Retinopathy of prematurity
46. Difficult breathing of newborn
47. Accidents requiring Critical Patient Unit care
48. Rheumatoid arthritis
49. Degenerative osteoarthritis
50. Epilepsy (program to improve management in children)
51. Eye trauma
52. Detached retina
53. Strabismus (children under 9 years)
54. Acute respiratory infections (children under 15 years old)
55. Comprehensive oral health
56. Dental emergencies

Source: Gobierno de Chile. Ministerios de Hacienda y Salud. Decreto n° 44 Aprueba garantías explícitas en salud del régimen general de garantías en salud; 2007.
